# Supplementary material for: Gfi1-Mediated Repression of c-Fos, Egr-1 and Egr-2, and Inhibition of ERK1/2 Signaling Contribute to the Role of Gfi1 in Granulopoiesis
Source: PubMed Central journal article supplement (PMC6345849; doi:10.1038/s41598-018-37402-z), 2019-01-24
Supplement: 41598_2018_37402_MOESM1_ESM.pdf [file 41598_2018_37402_MOESM1_ESM.pdf]

**Gfi1-Mediated Repression of *c-Fos*, *Egr-1* and *Egr-2*, and Inhibition of ERK1/2 Signaling  
Contribute to the Role of Gfi1 in Granulopoiesis**

Yangyang Zhang<sup>1</sup>, Nan Hu<sup>1</sup> and Fan Dong<sup>2</sup>

Department of Biological Sciences, University of Toledo, Toledo, Ohio 43606

<sup>1</sup> Yangyang Zhang and Nan Hu contributed equally to this work.

<sup>2</sup> Correspondence and requests for materials should be addressed to F.D. (email:  
[fan.dong@utoledo.edu](mailto:fan.dong@utoledo.edu))

## Supplementary Figures Legends

**Supplementary figure S1. Effects of Gfi1 overexpression on the expression of neutrophil vs monocyte differentiation markers.** 32D/Y729F/Gfi1 (A) and FDCP/Y729F/Gfi1 (B) cells were cultured in G-CSF in the absence (Ctr) or presence of Dox for 6 and 2 days, respectively. The mRNA levels of neutrophil elastase (NE), lactoferin (LF), M-CSF and MMP-12 were examined by qRT-PCR.

**Supplementary figure S2. Flow cytometric analyses of cell surface levels of G-CSFR and M-CSFR in unpurified and Lin<sup>-</sup> BM cells from Gfi1<sup>+/+</sup> and Gfi1<sup>-/-</sup> mice.** BM cells were obtained from 8-week old Gfi1<sup>+/+</sup> and Gfi1<sup>-/-</sup> mice prior to evaluation of G-CSFR and M-CSFR expression.

**Supplementary figure S3. Effects of the Mek1/2 inhibitors on the expression of neutrophil vs monocyte differentiation markers in Gfi1<sup>-/-</sup> BM cells.** Lin<sup>-</sup> cells from Gfi1<sup>-/-</sup> mice were cultured in the absence or presence of U0126 (U0) or PD0325901 (PD) for 3 day. The mRNA levels of myeloperoxidase (MPO), NE, LF, M-CSF and MMP-12 were examined by qRT-PCR.

**Supplementary figure S4.** Shown is the full-length blot for figure 5A, right panels.

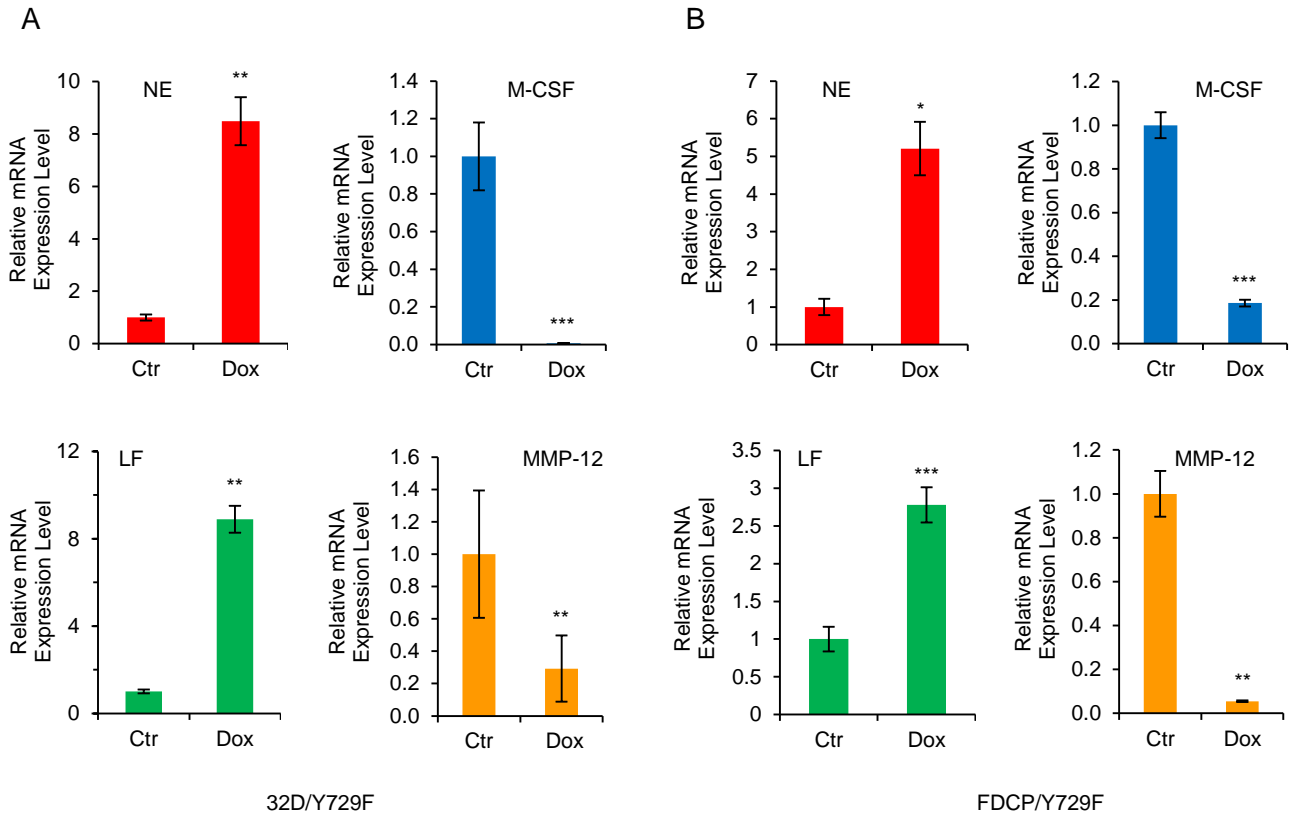

Supplementary figure S1

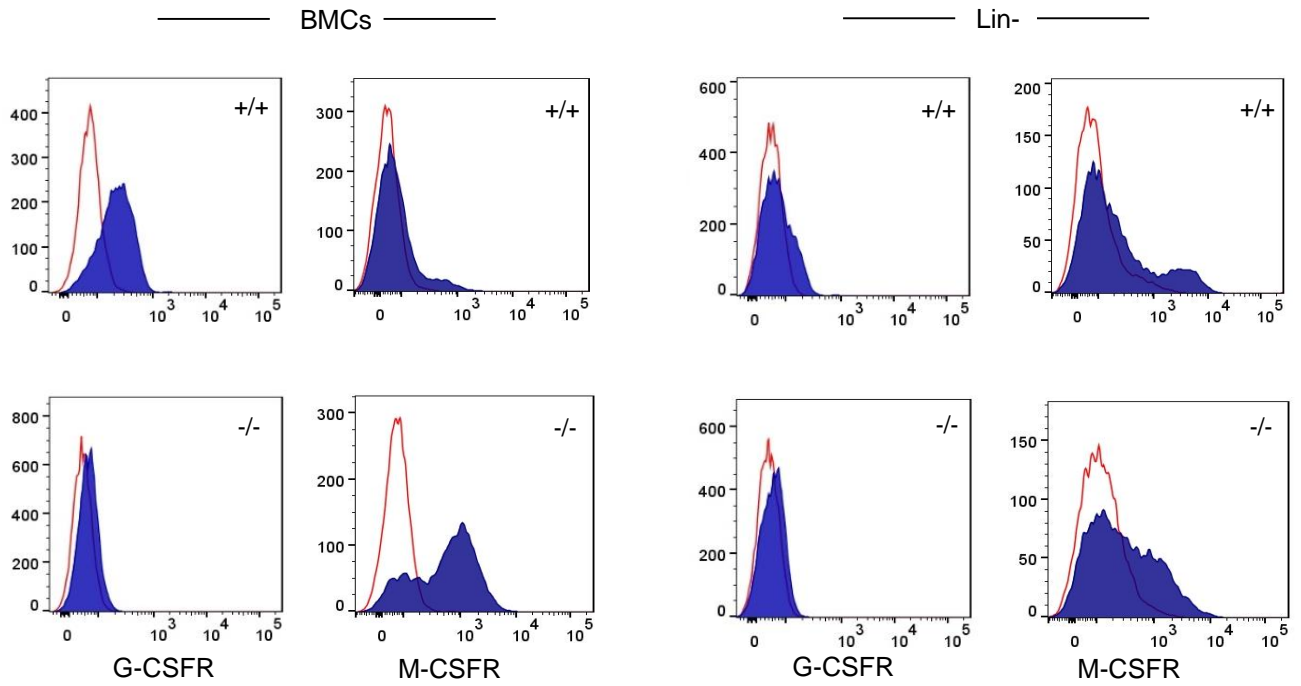

Supplementary figure S2

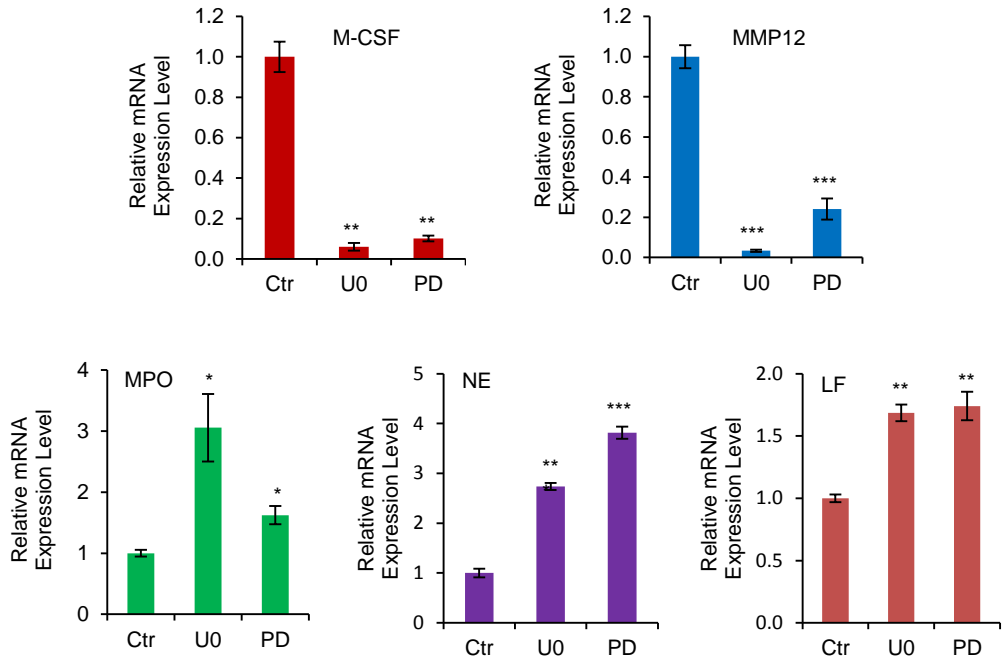

Supplementary figure S3

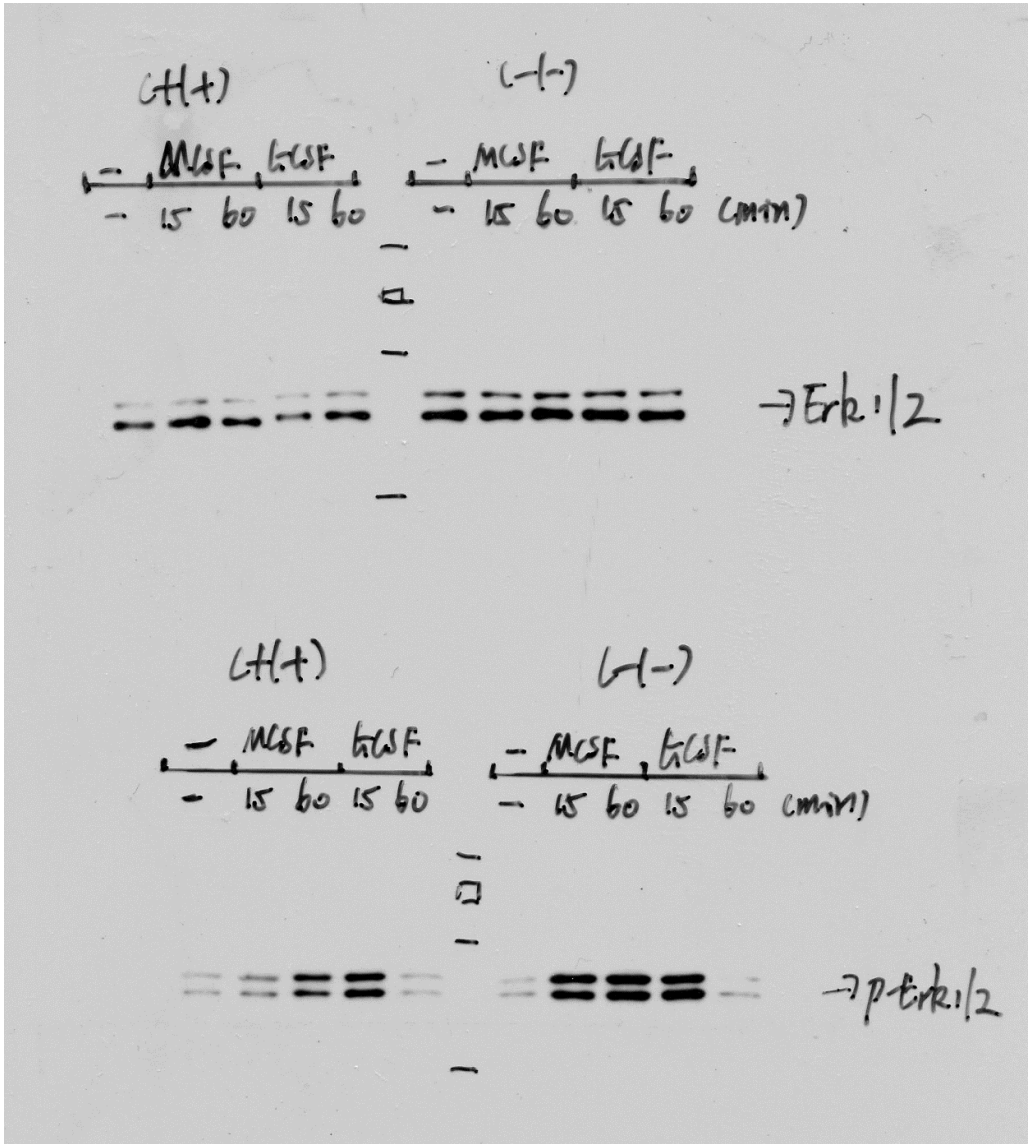

Supplementary figure S4
